# Supplementary material
Source: PubMed Central journal article supplement (PMC9815096)
Supplement: d-79-00022-sup1.pdf [file d-79-00022-sup1.pdf]

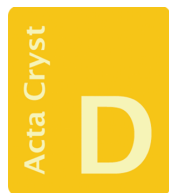

STRUCTURAL  
BIOLOGY

**Volume 79 (2023)**

**Supporting information for article:**

***Drosophila melanogaster* frataxin: protein crystal and predicted solution structure with identification of the iron-binding regions**

**Andria V. Rodrigues, Sharon Batelu, Tiara V. Hinton, John Rotondo, Lindsey Thompson, Joseph S. Brunzelle and Timothy L. Stemmler**

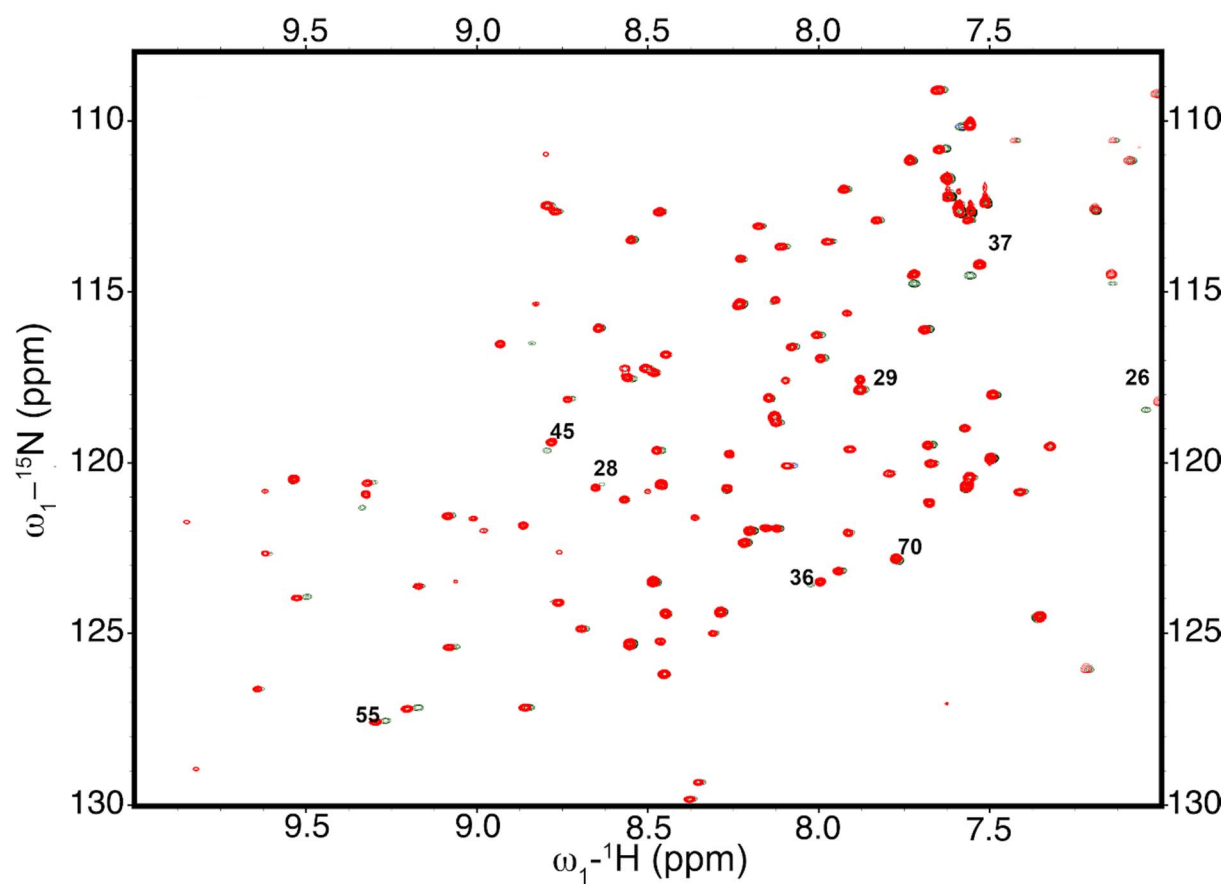

**Figure S1**  $^{15}\text{N}$ -HSQC of protein  $\pm$  Fe.
